# Supplementary material
Source: PubMed Central journal article supplement (PMC3020770)
Supplement: supp_M110.198416_jbc.M110.198416-1.pdf [file supp_M110.198416_jbc.M110.198416-1.pdf]

# Suppl. Fig. 1:

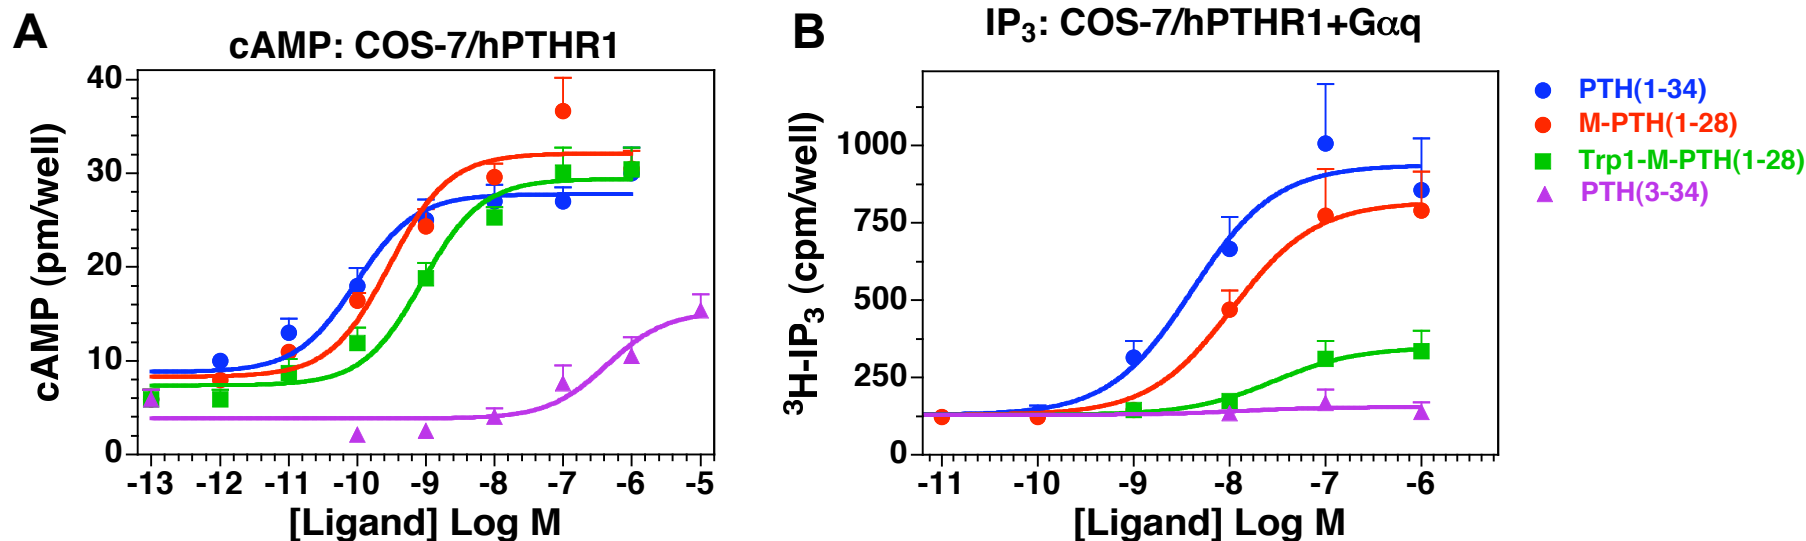

**Supplemental Fig. 1: Analog Activities on the human PTHR1.** The peptide analogs M-PTH(1-28), Trp<sup>1</sup>-M-PTH(1-28), PTH(3-34) and hPTH(1-34) control were assessed at varying concentrations for the capacity to stimulate cAMP formation (**A**), or IP<sub>3</sub> formation (**B**) via the hPTH1R in transiently transfected COS-7 cells; in **B**, the cells were co-transfected to express also Gαq. Data are means (±s.e.m.) of four (**A**) or five (**B**) experiments, each performed in duplicate.

## Suppl. Fig. 2:

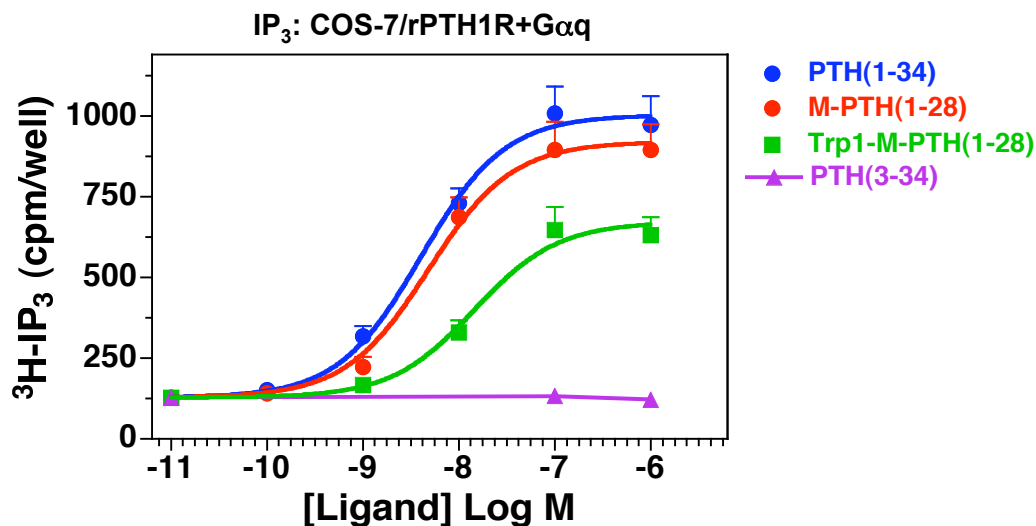

**Supplemental Fig. 2: Stimulation of IP<sub>3</sub> formation in COS-7 cells expressing the rat PTHR1 and Gαq.** The analogs M-PTH(1-28), Trp<sup>1</sup>-M-PTH(1-28), PTH(3-34), and hPTH(1-34) control were assessed at varying concentrations for the capacity to stimulate IP<sub>3</sub> formation in COS-7 cells transiently co-transfected to express the rPTH1R and Gαq. Data are means (±s.e.m.) of eight experiments, each performed in duplicate.
